# Supplementary material for: Highly sensitive detection of Salmonella typhimurium via gold and magnetic nanoparticle-mediated sandwich hybridization coupled with ICP-MS
Source: Royal Society of Chemistry journal article supplement (doi:10.1039/d4tb00291a), 2024-01-01
Supplement: d4tb00291a1.pdf [file d4tb00291a1.pdf]

## Supplementary information

### Highly Sensitive Detection of *Salmonella Typhimurium* via Gold and Magnetic Nanoparticle-Mediated Sandwich Hybridization Coupled with ICP-MS

Yujie Zhou<sup>a</sup>, Zhihui Tang<sup>b</sup>, Lei Li<sup>a</sup>, Yuzuo Chen<sup>b</sup>, Yuanyuan Xu<sup>a</sup>, Renjie Liu<sup>b</sup>,  
Yanrong Zhang<sup>b</sup>, Xiaoyan Liu<sup>c</sup>, Wenjuan Yang<sup>d</sup>, Baoning Wang<sup>b</sup>, Jieyu Zhang<sup>a,\*</sup>,  
Qing Jiang<sup>a\*</sup>, Yunbing Wang<sup>a</sup>

<sup>a</sup>National Engineering Research Center for Biomaterials, Sichuan University,  
Chengdu, Sichuan, 610065, China

<sup>b</sup>West China School of Basic Medical Sciences and Forensic Medicine, Sichuan  
University, Chengdu, Sichuan, 610041, China

<sup>c</sup>Department of Orthopedic Surgery, West China Hospital, Sichuan University/West  
China School of Nursing, Chengdu, Sichuan, 610041, China

<sup>d</sup>Department of Gastroenterology, West China Hospital, Sichuan University,  
Chengdu, Sichuan, 610041, China

\*Corresponding author. 29 Wangjiang Road, Chengdu, China, 610065

Tel: +86 028 85410537; Fax: +86 028 85410246

E-mail addresses: jieyu@scu.edu.cn; jiangq@scu.edu.cn

## Supplementary methods

### 1. Determination of grafting density of capture probes on the epoxy-functionalized MNPs

The average diameter of the MNPs was  $64 \pm 12$  nm (Fig. 2b). Despite their clustered morphology, these MNPs were approximated as spheres to calculate the average volume of individual MNP ( $V_{\text{MNP}}$ ).

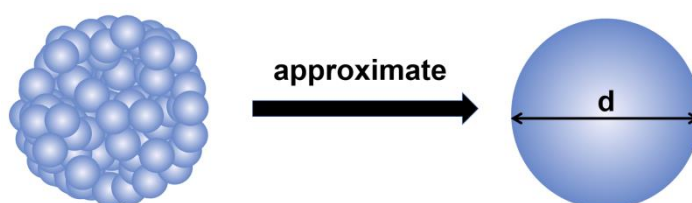

$$V_{\text{MNP}} = \frac{4}{3} \pi \left(\frac{d}{2}\right)^3 = 1.37 \times 10^{-22} \text{ m}^3$$

The density ( $\rho$ ) of the clustered MNPs was reported to be  $3.32 \text{ g}\cdot\text{cm}^{-3}$ ,<sup>1</sup> the average mass of an individual MNP was determined as:

$$m_{\text{MNP}} = V_{\text{MNP}} \times \rho = 4.55 \times 10^{-19} \text{ kg}$$

Considering the silanization layer on the epoxy-functionalized MNPs was very thin (Fig. S9), and the density of GPTMS ( $1.07 \text{ g}\cdot\text{mL}^{-1}$ ) is much lower than that of the MNPs, the epoxy-functionalization was presumed to have a negligible effect on the overall mass. Therefore, the average mass of an individual epoxy-functionalized MNP was approximated to remain at  $4.55 \times 10^{-19} \text{ kg}$ .

For the capture probe grafting, 0.39 mg of the epoxy-functionalized MNPs was added in each assay. Accordingly, the total number of the epoxy-functionalized MNPs ( $A_{\text{epoxy-functionalized MNPs}}$ ) present in each grafting reaction assay was calculated as:

$$A_{\text{epoxy-functionalized MNPs}} = \frac{0.39 \text{ mg}}{m_{\text{MNP}}} = 8.57 \times 10^{11}$$

To optimize the process of grafting the capture probes onto the epoxy-functionalized MNPs, 480  $\mu\text{L}$  ( $V_1$ ) of a capture probe solution at different concentrations ( $C_{\text{input}}$ ) was input into each grafting assay. The total volume of the grafting reaction ( $V_{\text{total}}$ ) was 680  $\mu\text{L}$ . After conjugation, the concentration of the ungrafted capture probes in the mixture was  $C_{\text{ungrafted}}$ . The mass of capture probes grafted onto the epoxy-functionalized MNPs was:

$$m_{\text{grafted}} = C_{\text{input}} \times V_1 - C_{\text{ungrafted}} \times V_{\text{total}}$$

The molecular weight ( $M_w$ ) of the capture probes was  $6410.3 \text{ g} \cdot \text{mol}^{-1}$ , thereby the amount of substance of the capture probes grafted onto the epoxy-functionalized MNPs ( $n_{\text{capture probe}}$ ) was:

$$n_{\text{capture probe}} = \frac{m_{\text{grafted}}}{M_w \text{ of capture probes}}$$

Thus, the total number of the capture probes grafted onto the epoxy-functionalized MNPs ( $A_{\text{capture probe}}$ ) was:

$$A_{\text{capture probe}} = n_{\text{capture probe}} \times 6.02 \times 10^{23}$$

Finally, the grafting density of the capture probes on each epoxy-functionalized MNP ( $P_{\text{capture probe}}$ ) was determined by calculating the number of capture probes grafted per MNP:

$$P_{\text{capture probe}} = \frac{A_{\text{capture probe}}}{A_{\text{epoxy-functionalized MNP}}}$$

## 2. Determination of grafting density of report probes on the AuNPs

The average diameter of the AuNPs was measured to be  $88 \pm 12 \text{ nm}$  (Fig. 4a). As illustrated below, despite their popcorn shape, these AuNPs were approximated as

spheres for calculating the average volume of an individual AuNP ( $V_{\text{AuNP}}$ ).

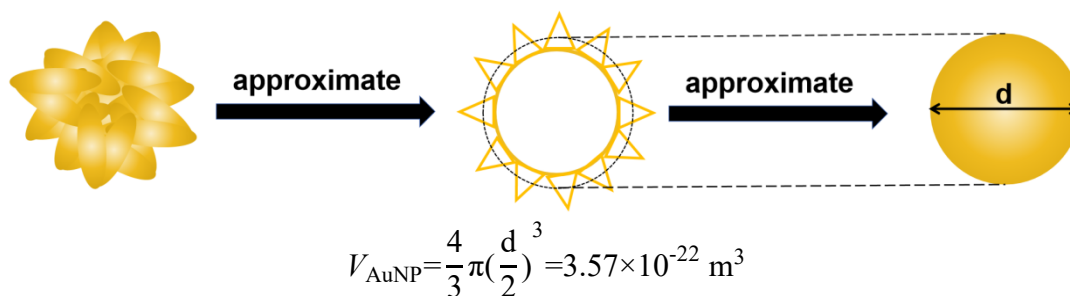

The specific surface area ( $\alpha$ ) of an individual spherical AuNP with the same particle size (88 nm) was:

$$\alpha_{\text{spherical AuNP}} = \frac{4\pi R^2}{\frac{4}{3}\pi R^3} = 3.53 \text{ m}^2 \cdot \text{g}^{-1}$$

The density ( $\rho$ ) of Au is  $19.3 \text{ g} \cdot \text{cm}^{-3}$ ,<sup>2</sup> the average mass of an individual AuNP was:

$$m_{\text{AuNP}} = V_{\text{AuNP}} \times \rho = 6.89 \times 10^{-18} \text{ kg}$$

For the report probe grafting, 0.74 mg of the AuNPs was added in each assay. Accordingly, the total number of the AuNPs ( $A_{\text{AuNPs}}$ ) present in the grafting reaction assay was calculated as:

$$A_{\text{AuNPs}} = \frac{0.74 \text{ mg}}{m_{\text{AuNPs}}} = 1.07 \times 10^{11}$$

To optimize the process of grafting the reporter probes onto the AuNPs, 480  $\mu\text{L}$  ( $V_1$ ) of a report probe solution at different concentrations ( $C_{\text{input}}$ ) was added in each assay. The total volume of the grafting reaction ( $V_{\text{total}}$ ) was 680  $\mu\text{L}$ . After conjugation, the concentration of the ungrafted report probes in the mixture was  $C_{\text{ungrafted}}$ . The mass of report probes grafted onto the AuNPs was:

$$m_{\text{grafted}} = C_{\text{input}} \times V_1 - C_{\text{ungrafted}} \times V_{\text{total}}$$

The molecular weight ( $M_w$ ) of the report probes was  $6015.0 \text{ g} \cdot \text{mol}^{-1}$ , thereby the amount of substance of the report probes grafted onto the AuNPs ( $n_{\text{report probe}}$ ) was:

$$n_{\text{report probe}} = \frac{m_{\text{grafted}}}{M_w \text{ of report probes}}$$

Therefore, the total number of the report probes grafted onto the AuNPs ( $A_{\text{capture probe}}$ ) was:

$$A_{\text{report probe}} = n_{\text{report probe}} \times 6.02 \times 10^{23}$$

Finally, the grafting density of the report probes on each AuNP ( $P_{\text{report probe}}$ ) was determined by calculating the number of report probes grafted per AuNP:

$$P_{\text{report probe}} = \frac{A_{\text{report probe}}}{A_{\text{AuNPs}}}$$

### 3. Determination of capture efficiency of capture probe-grafted MNPs for *Salmonella* DNA

The *Salmonella* genome, which is haploid, comprises approximately  $4.9 \times 10^6$  base pairs (bp).<sup>3</sup> Therefore, the  $M_w$  of the *Salmonella* DNA can be estimated using the following equation:<sup>4</sup>

$$M_w \text{ of the } Salmonella \text{ DNA} = (\text{number of nucleotides} \times 607.4) + 157.9 = 2.98 \times 10^9 \text{ g} \cdot \text{mol}^{-1}$$

The mass of a single copy of *Salmonella* DNA was then calculated as:

$$m \text{ of each copy } Salmonella \text{ DNA} = \frac{M_w \text{ of } Salmonella \text{ DNA}}{6.02 \times 10^{23}} = 4.95 \times 10^{-9} \mu\text{g}$$

Thus, the concentration of *Salmonella* DNA solution, measured using a Nanodrop spectrophotometer and reported in  $\text{ng} \cdot \mu\text{L}^{-1}$ , can be converted into the number of copies per mL (e.g.  $\text{copies} \cdot \text{mL}^{-1}$ ).

To optimize the capture efficiency of the capture probe-grafted MNPs for *Salmonella* DNA, 10  $\mu\text{L}$  of a  $10^{11} \text{ copies} \cdot \text{mL}^{-1}$  *Salmonella* DNA solution (equivalent to 495 ng *Salmonella* DNA) was hybridized with different amounts of the epoxy-

functionalized MNPs over varying durations. Considering the total volume of each hybridization assay was 55  $\mu\text{L}$  and the post-hybridization concentration of the residual *Salmonella* DNA solution was  $C_{\text{unhybridized}}$ , the capture efficiency ( $\eta$ ) can be determined as:

$$\eta = \left(1 - \frac{C_{\text{unhybridized}} \times 55 \mu\text{L}}{495 \text{ ng}}\right) \times 100\%$$

#### **4. Determination of capture efficiency of report probe-grafted AuNPs for *Salmonella* DNA**

Similarly, to optimize the capture efficiency of the report probe-grafted AuNPs for *Salmonella* DNA, 495 ng *Salmonella* DNA in 10  $\mu\text{L}$  of TE buffer was hybridized with varying quantities of the report probe-grafted AuNPs over different durations. Given that the total hybridization reaction volume was 55  $\mu\text{L}$  and the post-hybridization concentration of unhybridized *Salmonella* DNA denoted as  $C_{\text{unhybridized}}$ , the capture efficiency ( $\eta$ ) was also calculated as:

$$\eta = \left(1 - \frac{C_{\text{unhybridized}} \times 55 \mu\text{L}}{495 \text{ ng}}\right) \times 100\%$$

## Supplementary tables

**Table S1** Operating parameters of ICP-MS analysis.

| <b>Operating parameters</b>  | <b>Values</b>           |
|------------------------------|-------------------------|
| RF power                     | 1550 W                  |
| Plasma gas (Ar) flow rate    | 14 L·min <sup>-1</sup>  |
| Nebulizer gas (Ar) flow rate | 0.8 L·min <sup>-1</sup> |
| Auxiliary gas (Ar) flow rate | 0.8 L·min <sup>-1</sup> |
| Scanning mode                | Peak hopping            |
| Isotopes                     | <sup>197</sup> Au       |

**Table S2** Information of pathogenic bacteria used in anti-interference assay

| <b>Bacterial species</b> | <b>Bacterial strains</b> | <b>Bp</b> |
|--------------------------|--------------------------|-----------|
| <i>H. influenzae</i>     | ATCC 9006                | 1.9 M     |
| <i>S. pneumoniae</i>     | ATCC 6303                | 2.2 M     |
| <i>E. coli</i>           | ATCC 3110                | 5.9 M     |
| BHS                      | ATCC 19615               | 1.9 M     |
| CTB                      | -                        | 361       |
| AHS                      | ATCC 49619               | 1.9 M     |
| <i>N. meningitidis</i>   | WHOP                     | 2.3 M     |
| <i>S. pyogenes</i>       | ATCC 10389               | 1.9 M     |
| <i>L. acidophilus</i>    | ATCC 13651               | 2.0 M     |
| <i>P. aeruginosa</i>     | ATCC 17434               | 7.3 M     |



**Table S3** Comparative performance analysis of different detection methods for *Salmonella*.

| Detection methods | Nanomaterials | Function of nanomaterials | Morphology of nanomaterials | Detection range (CFU·mL <sup>-1</sup> ) | LOD (CFU·mL <sup>-1</sup> ) | Recovery | RSDs | Assay time | Refs |
|-------------------|---------------|---------------------------|-----------------------------|-----------------------------------------|-----------------------------|----------|------|------------|------|
| Plate culture     | -             | -                         | -                           | -                                       | -                           | -        | -    | 3 - 7 days | 5-9  |

| Detection methods | Nanomaterials  | Function of nanomaterials    | Morphology of nanomaterials                                                                      | Detection range (CFU·mL <sup>-1</sup> ) | LOD (CFU·mL <sup>-1</sup> ) | Recovery      | RSDs | Assay time | Refs |
|-------------------|----------------|------------------------------|--------------------------------------------------------------------------------------------------|-----------------------------------------|-----------------------------|---------------|------|------------|------|
| PCR               | Magnetic beads | Capture of <i>Salmonella</i> | 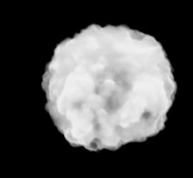 <p>Sphere</p> | 6 - 6.4 × 10 <sup>4</sup>               | 2                           | 85.9% - 92.1% | -    | 3 h        | 10   |
|                   | -              | -                            | -                                                                                                | 10 <sup>2</sup> - 10 <sup>7</sup>       | 2 × 10 <sup>2</sup>         | 84.2% - 99.2% | -    | 24 h       | 11   |
|                   | -              | -                            | -                                                                                                | -                                       | 130                         | -             | -    | 24 h       | 12   |

| Detection methods | Nanomaterials  | Function of nanomaterials        | Morphology of nanomaterials                                                                        | Detection range (CFU·mL <sup>-1</sup> ) | LOD (CFU·mL <sup>-1</sup> ) | Recovery | RSDs | Assay time | Refs |
|-------------------|----------------|----------------------------------|----------------------------------------------------------------------------------------------------|-----------------------------------------|-----------------------------|----------|------|------------|------|
|                   | Magnetic beads | Capture of <i>Salmonella</i>     | 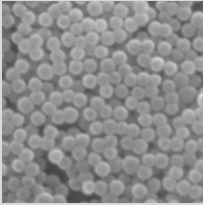 <p>Sphere</p>   | -                                       | 10 <sup>4</sup>             | -        | -    | 3 - 4 h    | 13   |
|                   | Magnetic beads | Capture of <i>Salmonella</i>     |  <p>Sphere</p>   | -                                       | 10 <sup>2</sup>             | -        | -    | 7 h        | 14   |
|                   | AuNPs          | Capture of <i>Salmonella</i> DNA |  <p>Sphere</p> | -                                       | 10 pg·μL <sup>-1</sup>      | -        | -    | > 55 min   | 15   |

| Detection methods                   | Nanomaterials | Function of nanomaterials | Morphology of nanomaterials | Detection range (CFU·mL <sup>-1</sup> )       | LOD (CFU·mL <sup>-1</sup> ) | Recovery | RSDs | Assay time | Refs |
|-------------------------------------|---------------|---------------------------|-----------------------------|-----------------------------------------------|-----------------------------|----------|------|------------|------|
| Isothermal amplification techniques | -             | -                         | -                           | 2.1 × 10 <sup>2</sup> - 2.1 × 10 <sup>3</sup> | 2.1 × 10 <sup>1</sup>       | -        | -    | 50 min     | 16   |
|                                     | -             | -                         | -                           | -                                             | 1.2 - 12 CFU/reaction       | -        | -    | 35 min     | 17   |
|                                     | -             | -                         | -                           | -                                             | 10 <sup>3</sup>             | -        | -    | 60 min     | 18   |

| Detection methods | Nanomaterials    | Function of nanomaterials    | Morphology of nanomaterials                                                                     | Detection range (CFU·mL <sup>-1</sup> )    | LOD (CFU·mL <sup>-1</sup> ) | Recovery       | RSDs      | Assay time | Refs |
|-------------------|------------------|------------------------------|-------------------------------------------------------------------------------------------------|--------------------------------------------|-----------------------------|----------------|-----------|------------|------|
| ELISA             | AuNPs            | Capture of <i>Salmonella</i> | 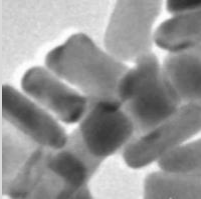<br>Nanorods  | $1.21 \times 10^{-1}$ - $1.21 \times 10^8$ | $1.21 \times 10^2$          | 99.2% - 110.7% | -         | 50 min     | 19   |
|                   | MNPs             | Capture of <i>Salmonella</i> | <br>Sphere    | -                                          | 10 cells·mL <sup>-1</sup>   | 90% - 114%     | 83% - 95% | 135 min    | 20   |
|                   | Carbon nanotubes | Capture of <i>Salmonella</i> | <br>Tubular | -                                          | 10 <sup>3</sup>             | -              | -         | 3 h        | 21   |

| Detection methods           | Nanomaterials | Function of nanomaterials                                  | Morphology of nanomaterials                                                                      | Detection range (CFU·mL <sup>-1</sup> )       | LOD (CFU·mL <sup>-1</sup> ) | Recovery     | RSDs        | Assay time | Refs |
|-----------------------------|---------------|------------------------------------------------------------|--------------------------------------------------------------------------------------------------|-----------------------------------------------|-----------------------------|--------------|-------------|------------|------|
|                             | MNPs          | Capture of <i>Salmonella</i>                               | -                                                                                                | 1.4 × 10 <sup>4</sup> - 5.9 × 10 <sup>5</sup> | 3.2 × 10 <sup>3</sup>       | 82.7% - 117% | -           | 4 h        | 22   |
| Electro-chemical biosensors | AuNPs         | Labelling of <i>Salmonella</i> and amplification of signal | 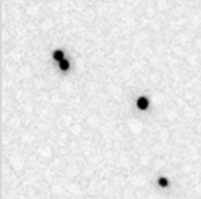 <p>Sphere</p> | 10 - 10 <sup>6</sup>                          | 10                          | 94.2% - 118% | 1.4% - 4.5% | 1 h        | 23   |

| Detection methods | Nanomaterials                                             | Function of nanomaterials | Morphology of nanomaterials                                                                                          | Detection range (CFU·mL <sup>-1</sup> ) | LOD (CFU·mL <sup>-1</sup> ) | Recovery | RSDs | Assay time | Refs |
|-------------------|-----------------------------------------------------------|---------------------------|----------------------------------------------------------------------------------------------------------------------|-----------------------------------------|-----------------------------|----------|------|------------|------|
|                   | AuNPs and chitosan composite                              | Electrode materials       | 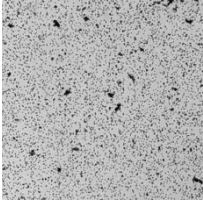<br>Sphere                         | 10 - 10 <sup>5</sup>                    | 5                           | -        | -    | 4 h        | 24   |
|                   | Reduced graphene oxide and TiO <sub>2</sub> nanoparticles | Electrode materials       | <br>Folded and wrinkled structure | 10 - 10 <sup>8</sup>                    | 10                          | -        | -    | 1 h        | 25   |

| Detection methods  | Nanomaterials                                  | Function of nanomaterials               | Morphology of nanomaterials                                                                            | Detection range (CFU·mL <sup>-1</sup> )         | LOD (CFU·mL <sup>-1</sup> ) | Recovery       | RSDs        | Assay time | Refs |
|--------------------|------------------------------------------------|-----------------------------------------|--------------------------------------------------------------------------------------------------------|-------------------------------------------------|-----------------------------|----------------|-------------|------------|------|
|                    | Magnetic beads                                 | Capture of <i>Salmonella</i>            | 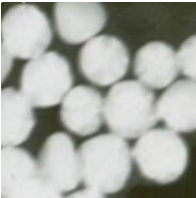<br>Sphere           | 10 <sup>2</sup> - 10 <sup>6</sup>               | 1.04 × 10 <sup>3</sup>      | -              | -           | 3 h        | 26   |
| Optical biosensors | AuNPs                                          | Colorimetric probes for UV-vis analysis | <br>Sphere           | 25 - 10 <sup>5</sup>                            | 10                          | 89% - 106.5%   | 5%          | -          | 27   |
|                    | polyethyleneimine-templated Ag/Cu nanoclusters | Capture of <i>Salmonella</i>            | <br>Irregular shape | 1.43 × 10 <sup>2</sup> - 1.43 × 10 <sup>7</sup> | 3.8                         | 83.8% - 103.5% | 0.5% - 4.9% | 1 h        | 28   |



| Detection methods | Nanomaterials                      | Function of nanomaterials                                              | Morphology of nanomaterials                                                                   | Detection range (CFU·mL <sup>-1</sup> )       | LOD (CFU·mL <sup>-1</sup> ) | Recovery       | RSDs        | Assay time | Refs |
|-------------------|------------------------------------|------------------------------------------------------------------------|-----------------------------------------------------------------------------------------------|-----------------------------------------------|-----------------------------|----------------|-------------|------------|------|
|                   | MNPs                               | Capture of <i>Salmonella</i>                                           | 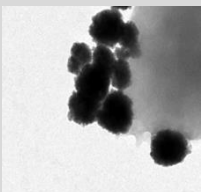<br>Sphere  | 10 <sup>1</sup> - 10 <sup>5</sup>             | 10                          | 80% - 105%     | -           | 2.5 h      | 29   |
|                   | AuNPs                              | Element labels for surface enhanced Raman spectroscopy (SERS) analysis | <br>Sphere  | 10 <sup>1</sup> - 10 <sup>7</sup>             | 5                           | -              | -           | 3 h        | 30   |
|                   | Fe <sub>3</sub> O <sub>4</sub> @Si | Capture of <i>Salmonella</i>                                           | <br>Sphere | 1.6 × 10 <sup>1</sup> - 1.6 × 10 <sup>7</sup> | 4                           | 92.6% - 106.7% | 0.7% - 5.5% | -          | 31   |

| Detection methods | Nanomaterials                  | Function of nanomaterials        | Morphology of nanomaterials                                                                             | Detection range (CFU·mL <sup>-1</sup> ) | LOD (CFU·mL <sup>-1</sup> ) | Recovery       | RSDs        | Assay time | Refs |
|-------------------|--------------------------------|----------------------------------|---------------------------------------------------------------------------------------------------------|-----------------------------------------|-----------------------------|----------------|-------------|------------|------|
|                   | AuNPs                          | Element labels for SERS analysis | 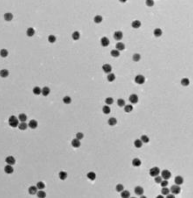<br>Sphere            | 27 - 2.7 × 10 <sup>5</sup>              | 27                          | 82.9% - 95.1%  | -           | -          | 32   |
|                   | MNPs                           | Capture of <i>Salmonella</i>     | <br>Sphere            | 10 <sup>1</sup> - 10 <sup>7</sup>       | 10                          | 97.6% - 100.4% | 1.8% - 6.5% | 30 min     | 33   |
|                   | Amorphous carbon nanoparticles | Capture of <i>Salmonella</i>     | <br>Irregular shape | 50 - 10 <sup>6</sup>                    | 35                          | 83% - 117%     | 4.7%        | -          | 34   |

| Detection methods | Nanomaterials             | Function of nanomaterials           | Morphology of nanomaterials                                                                         | Detection range (CFU·mL <sup>-1</sup> )   | LOD (CFU·mL <sup>-1</sup> ) | Recovery       | RSDs        | Assay time | Refs |
|-------------------|---------------------------|-------------------------------------|-----------------------------------------------------------------------------------------------------|-------------------------------------------|-----------------------------|----------------|-------------|------------|------|
|                   | Au@Platinum nanocatalysts | Labeling <i>Salmonella</i>          | 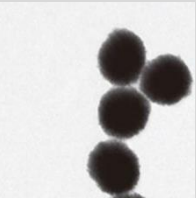<br>Porous sphere | 18 - 1.8 × 10 <sup>7</sup>                | 17                          | 88.7% - 110.6% | 6% - 8.5%   | 1 h        | 35   |
|                   | AuNPs                     | Capture <i>Salmonella</i> and color | <br>Sphere        | 7 × 10 <sup>1</sup> - 7 × 10 <sup>9</sup> | 23                          | 94.9% - 105.6% | 2.4% - 4.9% | 2.5 h      | 36   |
|                   | AuNPs                     | Element labels for SERS analysis    | <br>Sphere       | 10 <sup>2</sup> - 10 <sup>7</sup>         | 35                          | 94.5% - 105%   | -           | 1 h        | 37   |

| Detection methods | Nanomaterials | Function of nanomaterials          | Morphology of nanomaterials                                                                         | Detection range (CFU·mL <sup>-1</sup> )                                                 | LOD (CFU·mL <sup>-1</sup> ) | Recovery       | RSDs          | Assay time | Refs      |
|-------------------|---------------|------------------------------------|-----------------------------------------------------------------------------------------------------|-----------------------------------------------------------------------------------------|-----------------------------|----------------|---------------|------------|-----------|
| ICP-MS            | AuNPs         | Element labels for ICP-MS analysis | 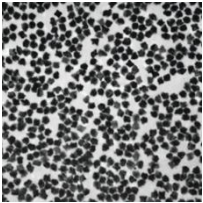<br>Popcorn-shape | 10 <sup>2</sup> - 10 <sup>5</sup>                                                       | 100                         | -              | -             | 40 min     | 38        |
|                   | AuNPs         | Element labels for ICP-MS analysis | <br>Popcorn-shape | 1 - 2.1 × 10 <sup>8</sup> (10 <sup>1</sup> - 10 <sup>10</sup> copies·mL <sup>-1</sup> ) | 1                           | 96.8% - 102.8% | 0.75% - 1.61% | 70 min     | This work |

## Supplementary figures

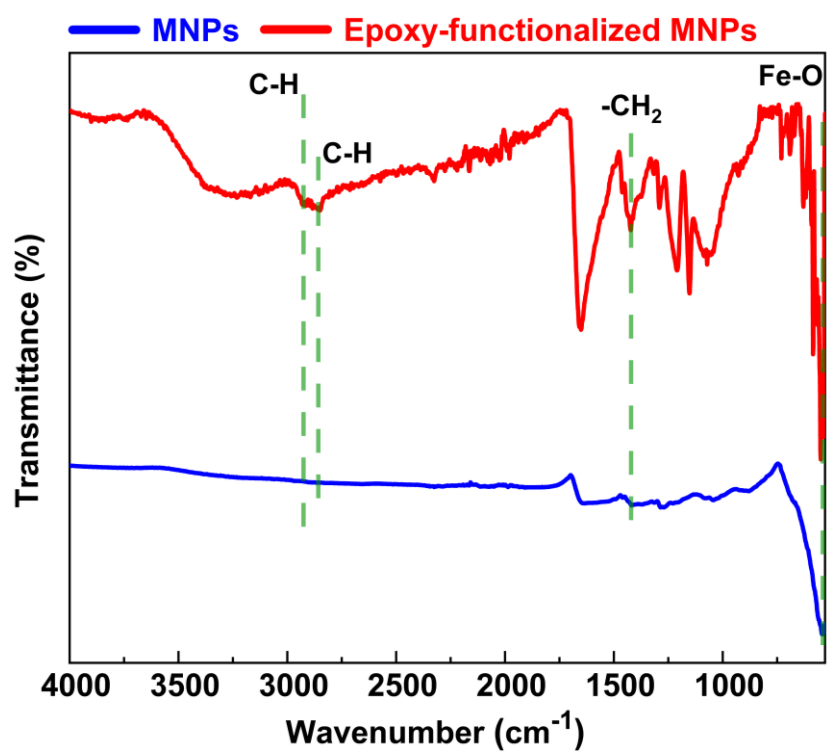

Figure S1. ATR-FTIR spectra of MNPs and epoxy-functionalized MNPs.

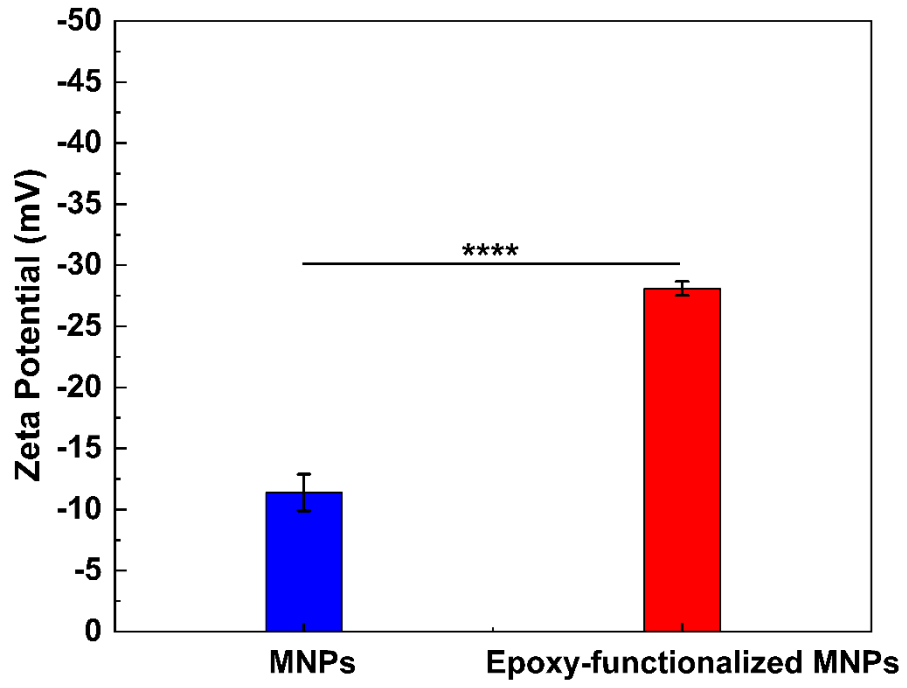

Figure S2. Zeta potential of MNPs and epoxy-functionalized MNPs.

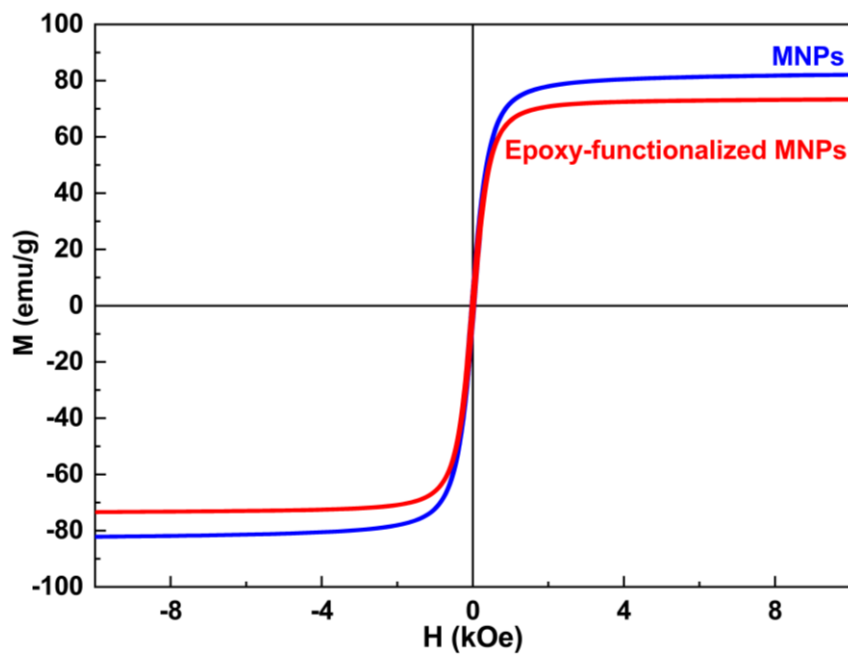

**Figure S3.** M-H curves of MNPs and epoxy-functionalized MNPs.

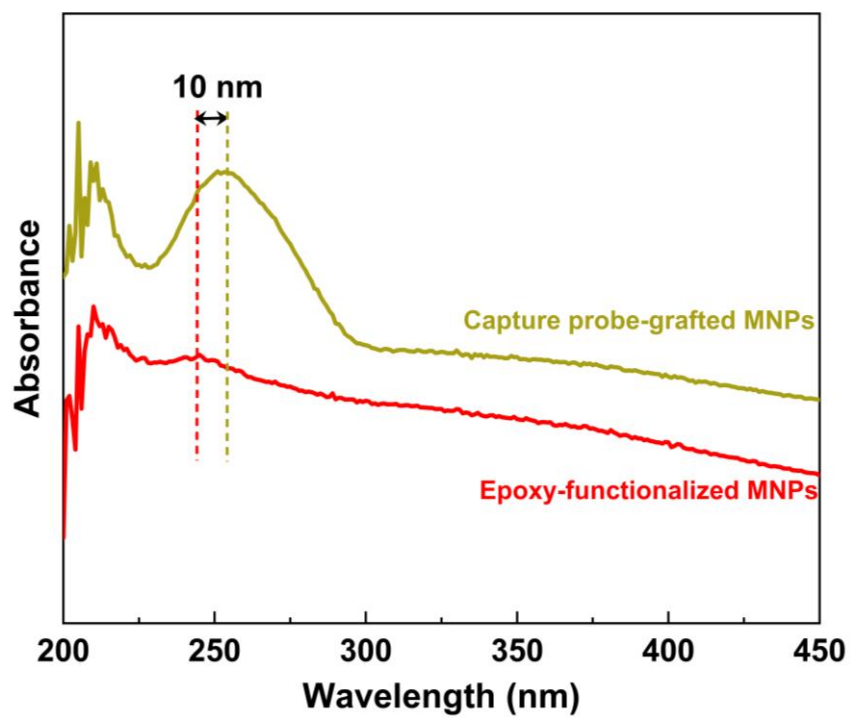

**Figure S4.** UV-vis spectra of epoxy-functionalized MNPs and capture probe-grafted MNPs.



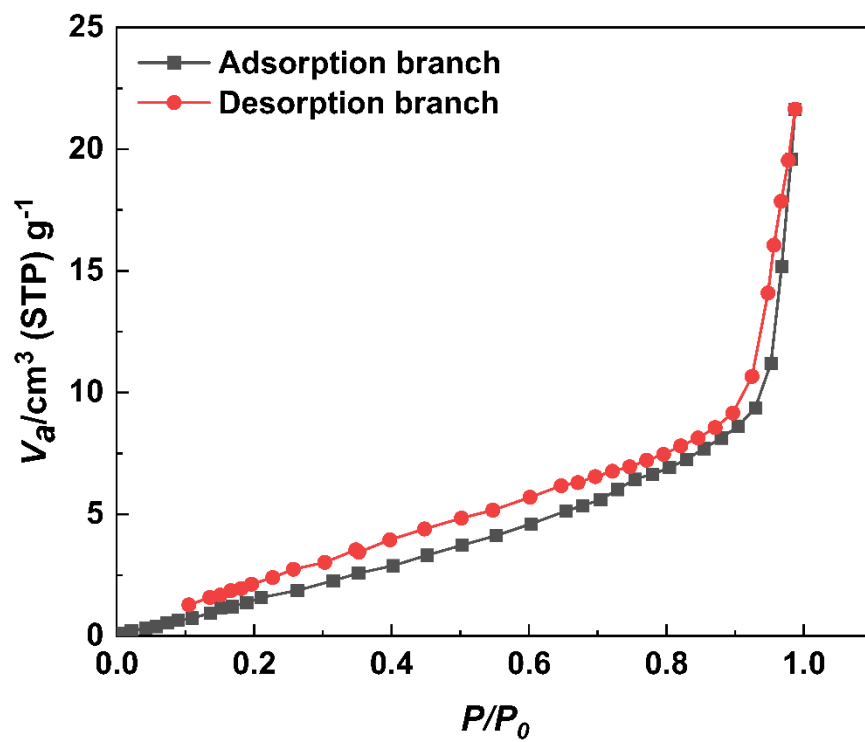

Figure S5.  $\text{N}_2$  adsorption-desorption isotherm of AuNPs.

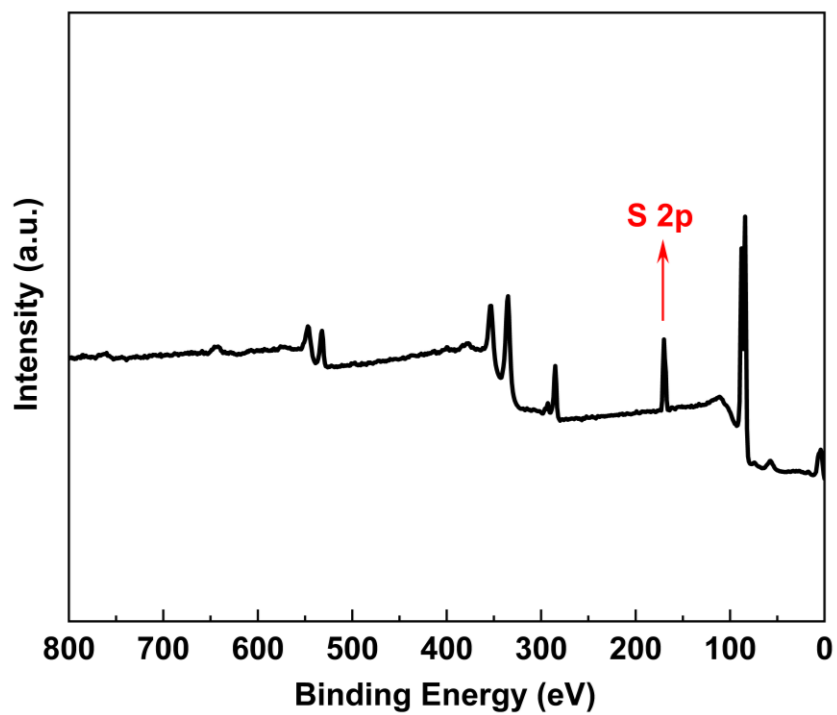

**Figure S6.** Wide-scan XPS spectrum of report probe-grafted AuNPs.

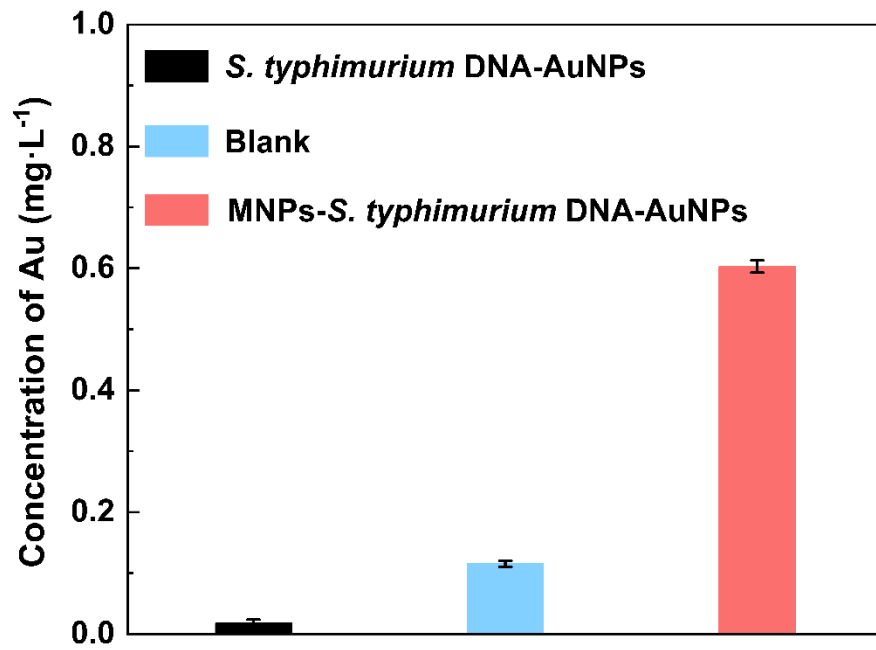

**Figure S7.** Effect of capture probe-grafted MNPs on isolation of the MNPs-*S. typhimurium* DNA-AuNPs complexes.

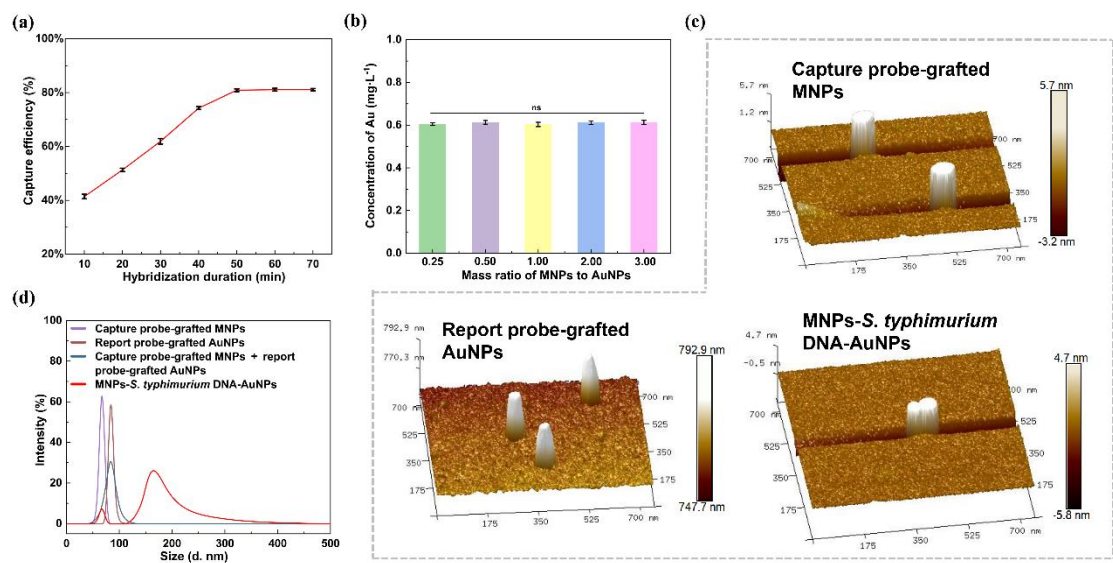

**Figure S8.** (a) Effect of hybridization duration on the capture efficiency of capture probe-grafted MNPs and report probe-grafted AuNPs on *S. typhimurium* DNA. (b) Effect of the mass ratio of capture probe-grafted MNPs to report probe-grafted AuNPs on assay performance. (c) AFM images and (d) DLS analysis demonstrating the formation of MNPs-*S. typhimurium*-AuNPs complexes.

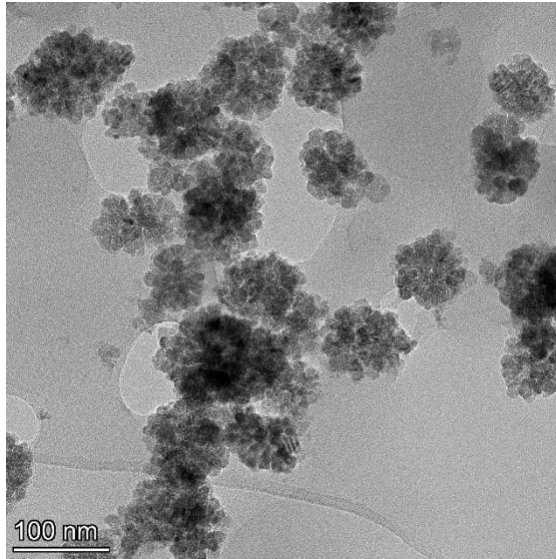

**Figure S9.** TEM images of the epoxy-functionalized MNPs ( $68 \pm 10$  nm).

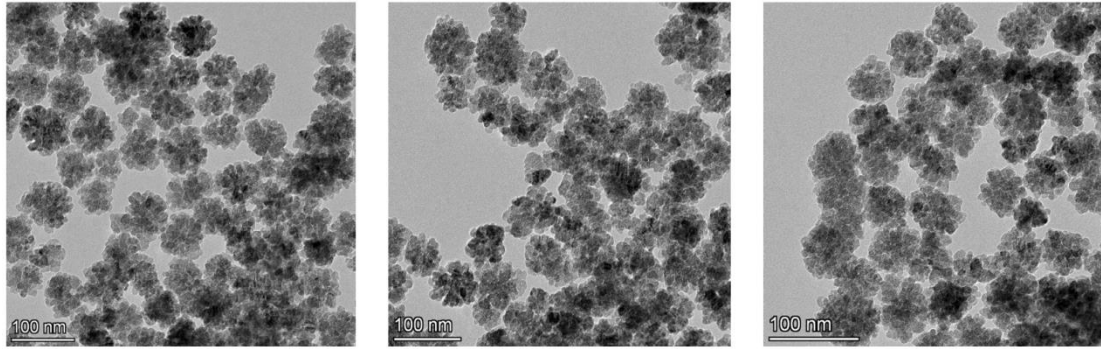

**Figure S10.** TEM images of three different batches of MNPs synthesized with the  $V_{EG}/V_{DEG}$  ratio of 4/16.

## References

- 1 J. Choi, S. Han, K. T. Nam and Y. Seo, *ACS Appl. Nano Mater.*, 2020, **3**, 10931-10940.
- 2 L. E. Cole, R. D. Ross, J. M. Tilley, T. Vargo-Gogola and R. K. Roeder, *Nanomedicine*, 2015, **10**, 321-341.
- 3 S. Baker and G. Dougan, *Clin. Infect. Dis.*, 2007, **45**, S29-S33.
- 4 Y. M. Tseytlin, in *Advanced Mechanical Models of DNA Elasticity*, ed. Y. M. Tseytlin, Academic Press, Boston, 2016, pp.1-37.
- 5 E. de Boer and R. R. Beumer, *Int. J. Food Microbiol.*, 1999, **50**, 119-130.
- 6 H. Ayçiçek, H. Aydoğan, A. Küçükaraaslan, M. Baysallar and A. C. Başustaoğlu, *Food Control*, 2004, **15**, 253-259.
- 7 P. Arora, A. Sindhu, N. Dilbaghi and A. Chaudhury, *Biosens. Bioelectron.*, 2011, **28**, 1-12.
- 8 N. Paniel, J. Baudart, A. Hayat and L. Barthelmebs, *Methods*, 2013, **64**, 229-240.
- 9 R. Ferretti, I. Mannazzu, L. Cocolin, G. Comi and F. Clementi, *Appl. Environ. Microbiol.*, 2001, **67**, 977-978.
- 10 A. C. Vinayaka, T. A. Ngo, K. Kant, P. Engelsmann, V. P. Dave, M. Shahbazi, A. Wolff and D. D. Bang, *Biosens. Bioelectron.*, 2019, **129**, 224-230.
- 11 S. Kawasaki, P. M. Fratamico, N. Horikoshi, Y. Okada, K. Takeshita, T. Sameshima and S. Kawamoto, *Foodborne Pathog. Dis.*, 2010, **7**, 549-554.
- 12 S. Maurischat, B. Baumann, A. Martin and B. Malorny, *Int. J. Food Microbiol.*, 2015, **193**, 8-14.
- 13 P. Bakthavathsalam, V. K. Rajendran, U. Saran, S. Chatterjee and B. M. Jaffar Ali, *Microchim. Acta*, 2013, **180**, 1241-1248.
- 14 S. A. Sharief, O. Caliskan-Aydogan and E. C. Alocilja, *Food Control*, 2023, **150**, 109770.
- 15 J. Du, S. Wu, L. Niu, J. Li, D. Zhao and Y. Bai, *Anal. Methods*, 2020, **12**, 212-217.
- 16 Y. Shang, Q. Ye, S. Cai, Q. Wu, R. Pang, S. Yang, X. Xiang, C. Wang, F. Zha, Y. Ding, Y. Zhang, J. Wang, X. Sun and J. Zhang, *Lwt*, 2021, **142**, 110999.
- 17 L. Hu, L. M. Ma, S. Zheng, X. He, T. S. Hammack, E. W. Brown and G. Zhang, *Food Control*, 2018, **88**, 190-197.
- 18 O. Masashi, O. Yousuke, K. Shuichi, T. Kazuaki, I. Masanari, K. Tadashi and N. Masayuki, *Avian Dis.*, 2009, **53**, 216-221.
- 19 B. Gao, X. Chen, X. Huang, K. Pei, Y. Xiong, Y. Wu, H. Duan, W. Lai and Y. Xiong, *J. Dairy Sci.*, 2019, **102**, 1997-2007.
- 20 S. Chattopadhyay, A. Kaur, S. Jain, P. K. Sabharwal and H. Singh, *Anal. Chim. Acta*, 2016, **937**, 127-135.
- 21 W. Chunglok, D. K. Wuragil, S. Oaew, M. Somasundrum and W. Surareungchai, *Biosens. Bioelectron.*, 2011, **26**, 3584-3589.
- 22 M. Bai, Y. Wang, C. Zhang, Y. Wang, J. Wei, X. Liao, J. Wang, L. Anfossi and Y. Wang, *Food Chem.*, 2023, **424**, 136416.
- 23 Y. Hou, W. Tang, W. Qi, X. Guo and J. Lin, *Biosens. Bioelectron.*, 2020, **157**, 112160.
- 24 C. Xiang, R. Li, B. Adhikari, Z. She, Y. Li and H. Kraatz, *Talanta*, 2015, **140**, 122-127.
- 25 S. Muniandy, S. J. Teh, J. N. Appaturi, K. L. Thong, C. W. Lai, F. Ibrahim and B. F. Leo, *Bioelectrochemistry*, 2019, **127**, 136-144.

- 26 M. Xu, R. Wang and Y. Li, *Talanta*, 2016, **148**, 200-208.
- 27 N. Duan, B. Xu, S. Wu and Z. Wang, *Anal. Sci.*, 2016, **32**, 431-436.
- 28 S. Dou, M. Liu, F. Zhang, B. Li, Y. Zhang, F. Li, Y. Guo and X. Sun, *Microchim. Acta*, 2023, **190**, 403.
- 29 Y. Ding, Z. Li, C. Huang, Y. Zhang, J. Wang and X. Wang, *J. Food Safety*, 2023, **43**, e13091.
- 30 X. Ma, Y. Liu, N. Zhou, N. Duan, S. Wu and Z. Wang, *Anal. Methods*, 2016, **8**, 8099-8105.
- 31 S. Sharma, G. Kaur, M. K. Nayak and A. Deep, *Environ. Sci.: Nano*, 2023, **10**, 2473-2488.
- 32 N. Duan, M. Shen, S. Qi, W. Wang, S. Wu and Z. Wang, *Spectrochim. Acta, Part A*, 2020, **230**, 118103.
- 33 H. Li, H. Xu, S. Yao, S. Wei, X. Shi, C. Zhao, J. Li and J. Wang, *Talanta*, 2024, **270**, 125505.
- 34 N. Duan, S. Wu, S. Dai, T. Miao, J. Chen and Z. Wang, *Microchim. Acta*, 2015, **182**, 917-923.
- 35 L. Zheng, G. Cai, W. Qi, S. Wang, M. Wang and J. Lin, *ACS Sens.*, 2020, **5**, 65-72.
- 36 F. Zhao, H. Yan, Y. Zheng, Y. Zu, S. Yang, H. Hu, S. Shi, H. Liang and X. Niu, *Food Chem.*, 2023, **426**, 136581.
- 37 X. Xu, X. Ma, H. Wang and Z. Wang, *Microchim. Acta*, 2018, **185**, 325.
- 38 Y. Lin and A. T. Hamme II, *J. Mater. Chem. B*, 2015, **3**, 3573-3582.
